# Supplementary material for: Direct conversion of astrocytes into neuronal cells by drug cocktail
Source: PubMed Central journal article supplement — Cell Res. 2015 Oct 2;25(11):1269–72. doi: 10.1038/cr.2015.120 (PMC4650423; doi:10.1038/cr.2015.120), 2015-10-02
Supplement: cr2015120x3.pdf [file cr2015120x3.pdf]

---

**Supplementary information, Table S1** Primer sets for Q-PCR reactions.

| Gene           | Sequence | (5'→3')                  |
|----------------|----------|--------------------------|
| <i>NeuroD1</i> | Forward  | CAGTCCAGAATAAGTGCTGTTG   |
|                | Reverse  | GTGCATTACACCATAATACACAGG |
| <i>NeuroG2</i> | Forward  | TCGGCTTAACTGGAGTGCC      |
|                | Reverse  | GTGTGTTGTCGTTCTCGTGC     |
| <i>Sox2</i>    | Forward  | CTGGACTGCGAACTGGAGAAG    |
|                | Reverse  | TTGCACCCCTCCCAATC        |
| <i>Pax6</i>    | Forward  | ACCTGTCTCCTTCACATCAG     |
|                | Reverse  | TTGGTGAGGGCGGTGTCT       |
| <i>Ascl1</i>   | Forward  | CCCCCAACTACTCCAACGAC     |
|                | Reverse  | AGTCCAGCAGCTCTTGTTCC     |
| <i>Dlx2</i>    | Forward  | CGGCCTCAACAATGTCTCCT     |
|                | Reverse  | TGTTGACCGGAGACGAACTG     |
| <i>Notch1</i>  | Forward  | TACGCCTGTGGCAGAATAAG     |
|                | Reverse  | TCCTCATCAGCTTGACACAC     |
| <i>Notch2</i>  | Forward  | TGCACACACTAGTCTTCATGTC   |
|                | Reverse  | TTAAGGTGCAGGTTCAGAAGG    |
| <i>Notch3</i>  | Forward  | GCACCTCTCTGTCTTGTAGTG    |
|                | Reverse  | CAAGGTGGTGAAGGTCAG       |
| <i>Notch4</i>  | Forward  | TAGGATGTCCGGTTGAGATAGA   |
|                | Reverse  | TTCTTGGTCCAGAGTTTAGGG    |
| <i>Dll1</i>    | Forward  | GTGTTATAGCGACTGAGGTGTAAG |
|                | Reverse  | CCTCTCTCAGCAGCATTTCATC   |
| <i>Dll3</i>    | Forward  | GCTGACTGGAATCATCCTGAA    |
|                | Reverse  | CAGGCCTCTCGTCATAAA       |
| <i>Dll4</i>    | Forward  | CCAACCTGAAGCCGATCTT      |
|                | Reverse  | GGCCAGTGCTTCTGATTCTT     |
| <i>Jag1</i>    | Forward  | ACACCCGAACTGGACAAATAA    |
|                | Reverse  | GTGCCCTCAAACCTACCTATG    |
| <i>Jag2</i>    | Forward  | AAGGCCGTGTGCATAGTTTC     |
|                | Reverse  | GCCTGACAGCCGTTGAATAA     |
| <i>Hes1</i>    | Forward  | GGCCAATTTGCCTTTCATC      |
|                | Reverse  | GGAAGGTGACACTGCGTTAG     |
| <i>Hes5</i>    | Forward  | AGCCCGTAGAGGACTTTCCTT    |
|                | Reverse  | CAGGCTGAGTGCTTTCCTATG    |
| <i>HPRT</i>    | Forward  | AGTCCCAGCGTCGTGATTAG     |
|                | Reverse  | TTCCAAATCCTCGGCATAATGA   |

---
